# Supplementary material for: Olipudase alfa for treatment of acid sphingomyelinase deficiency (ASMD): safety and efficacy in adults treated for 30 months
Source: Springer Nature journal article supplement (doi:10.1007/s10545-017-0123-6), 2018-01-05
Supplement: MOESM2 [file 15346946]

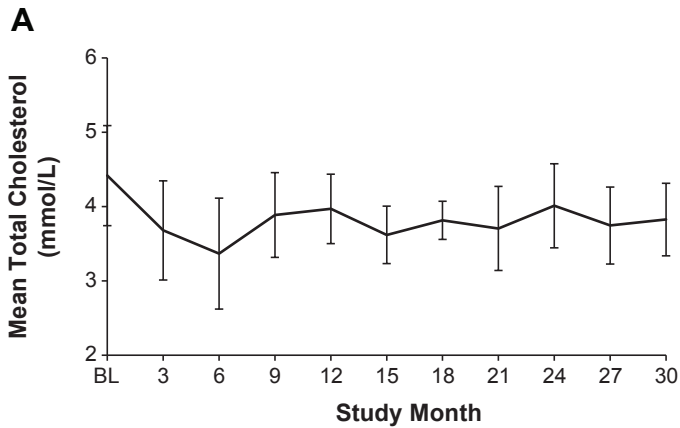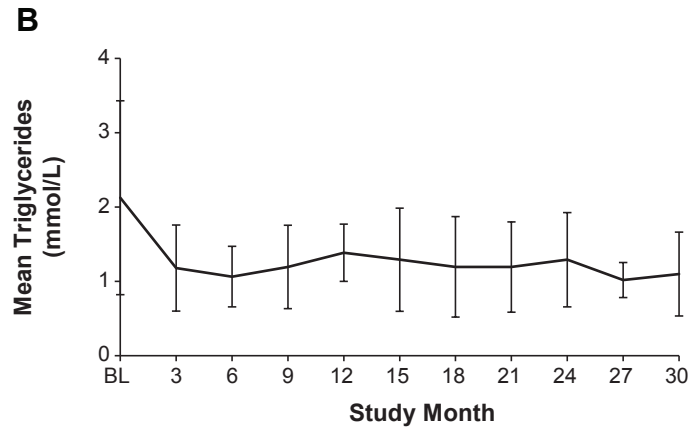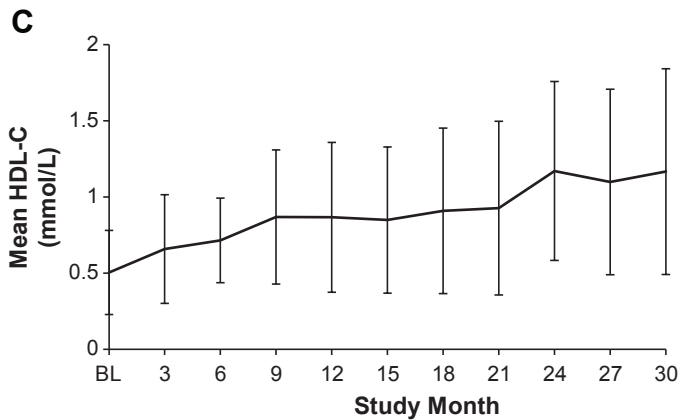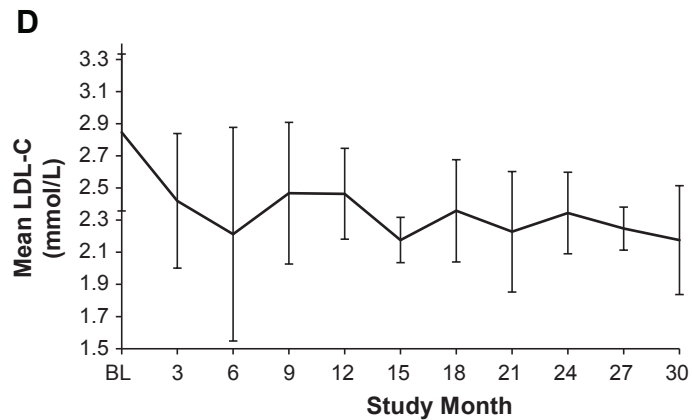

Total cholesterol normal range: US <5.18 mmol/L; UK 0-3.9 mmol/L  
 HDL-C normal range: US male >0.777; US female >0.9065 mmol/L; UK >1.2 mmol/L  
 LDL-C normal range: US <3.3411 mmol/L; UK 0-2 mmol/L  
 Triglycerides normal range: <1.7 mmol/L
